# Supplementary material for: miR-21 Promotes Human Nucleus Pulposus Cell Proliferation through PTEN/AKT Signaling
Source: PubMed Central journal article supplement (PMC3975380; doi:10.3390/ijms15034007), 2014-03-05
Supplement: ijms-15-04007-s001.pdf [file ijms-15-04007-s001.pdf]

# Supplementary Information

**Table S1.** Clinical Finding in 54 Patients with LDH.

| <b>Patient No.</b> | <b>Sex/Age (year)</b> | <b>Type of LDH</b> | <b>Level</b> | <b>Duration of Symptoms(mo)</b> | <b>MRI Scores</b> |
|--------------------|-----------------------|--------------------|--------------|---------------------------------|-------------------|
| 1                  | F/53                  | SE                 | L5/S1        | 9                               | 4.                |
| 2                  | M/54                  | P                  | L4/L5        | 15                              | 5.                |
| 3                  | M/56                  | S                  | L3/L4        | 25                              | 5.                |
| 4                  | F/42                  | TE                 | L4/L5        | 24                              | 5.                |
| 5                  | M/39                  | S                  | L5/S1        | 16                              | 4.                |
| 6                  | F/44                  | P                  | L4/L5        | 34                              | 4.                |
| 7                  | M/56                  | P                  | L4/L5        | 12                              | 5.                |
| 8                  | M/42                  | SE                 | L5/S1        | 12                              | 5.                |
| 9                  | F/39                  | TE                 | L5/S1        | 12                              | 4.                |
| 10                 | M/46                  | SE                 | L4/L5        | 21                              | 5.                |
| 11                 | F/53                  | TE                 | L4/L5        | 5                               | 3.                |
| 12                 | M/36                  | TE                 | L5/S1        | 1                               | 4.                |
| 13                 | F/46                  | P                  | L4/L5        | 28                              | 4.                |
| 14                 | M/51                  | S                  | L5/S1        | 26                              | 5.                |
| 15                 | F/41                  | P                  | L5/S1        | 24                              | 3.                |
| 16                 | F/42                  | SE                 | L4/L5        | 36                              | 3.                |
| 17                 | M/33                  | TE                 | L5/S1        | 21                              | 3.                |
| 18                 | F/55                  | SE                 | L3/L4        | 24                              | 4.                |
| 19                 | M/51                  | P                  | L4/L5        | 21                              | 4.                |
| 20                 | M/56                  | S                  | L3/L4        | 31                              | 4.                |
| 21                 | F/46                  | S                  | L4/L5        | 34                              | 3.                |
| 22                 | M/56                  | SE                 | L5/S1        | 18                              | 5.                |
| 23                 | F/42                  | P                  | L4/L5        | 13                              | 4.                |
| 24                 | M/34                  | S                  | L5/S1        | 17                              | 5.                |
| 25                 | M/55                  | P                  | L4/L5        | 20                              | 5.                |
| 26                 | M/44                  | S                  | L3/L4        | 12                              | 2.                |
| 27                 | M/46                  | SE                 | L5/S1        | 36                              | 4.                |
| 28                 | M/31                  | P                  | L3/L4        | 16                              | 2.                |
| 29                 | M/32                  | SE                 | L4/L5        | 3                               | 2.                |
| 30                 | F/36                  | TE                 | L3/L4        | 13                              | 3.                |
| 31                 | M/46                  | P                  | L3/L4        | 7                               | 3.                |
| 32                 | F/57                  | P                  | L5/S1        | 18                              | 4.                |
| 33                 | M/54                  | SE                 | L5/S1        | 15                              | 4.                |
| 34                 | F/43                  | P                  | L4/L5        | 9                               | 3.                |
| 35                 | M/42                  | TE                 | L5/S1        | 11                              | 3.                |
| 36                 | F/38                  | S                  | L3/L4        | 3                               | 3.                |
| 37                 | F/45                  | S                  | L4/L5        | 18                              | 3.                |
| 38                 | M/52                  | S                  | L5/S1        | 6                               | 3.                |

Table S1. Cont.

| Patient No. | Sex/Age (year) | Type of LDH | Level | Duration of Symptoms(mo) | MRI Scores |
|-------------|----------------|-------------|-------|--------------------------|------------|
| 39          | F/29           | P           | L4/L5 | 6                        | 2.         |
| 40          | F/48           | SE          | L4/L5 | 11                       | 3.         |
| 41          | F/54           | TE          | L5/S1 | 6                        | 3.         |
| 42          | M/48           | SE          | L3/L4 | 19                       | 4.         |
| 43          | F/55           | TE          | L4/L5 | 18                       | 4.         |
| 44          | M/38           | TE          | L4/L5 | 8                        | 2.         |
| 45          | F/54           | SE          | L5/S1 | 12                       | 4.         |
| 46          | F/36           | S           | L3/L4 | 12                       | 2.         |
| 47          | M/47           | TE          | L5/S1 | 25                       | 5.         |
| 48          | M/48           | P           | L4/L5 | 31                       | 4.         |
| 49          | M/41           | TE          | L5/S1 | 29                       | 3.         |
| 50          | M/56           | P           | L3/L4 | 23                       | 4.         |
| 51          | F/55           | TE          | L3/L4 | 15                       | 4.         |
| 52          | M/47           | P           | L4/L5 | 21                       | 5.         |
| 53          | M/51           | S           | L5/S1 | 23                       | 4.         |
| 54          | M/53           | TE          | L4/L5 | 20                       | 5.         |

F, indicates female; LDH, lumbar disc herniation; M, male; P, protrusion; S, sequestration; SE, subligamentous extrusion; TE, transligamentous extrusion; L, lumbar; S, sacral; MRI, magnetic resonance imaging.

Table S2. Primer/mimics/probe sequence.

| Name                              | Sequence (5'-3')                                  |
|-----------------------------------|---------------------------------------------------|
| miRNA reverse transcription prime |                                                   |
| miRNA-21                          | CGTCGCTACATCGAGTGTAGCATATGCGACGTCAACATC           |
| U6 snRNA                          | AAAATATGGAACGCTTCACGAATTTG                        |
| Real-time PCR primer sequence     |                                                   |
| miRNA-21                          | TGTCGGGTAGCTTATCAGAC<br>TTCAGACAGCCATCGACTG       |
| U6 snRNA                          | CTCGCTTCGGCAGCACATATACT<br>ACGCTTCACGAATTTGCGTGTC |
| PTEN                              | GCGTGCAGATAATGACAAGG<br>GGATTTGACGGCTCCTCTAC      |
| GAPDH                             | CAAGGTCATCCATGACAACTTTG<br>GTCCACCACCCTGTTGCTGTAG |
| miRNA Mimics sequence             |                                                   |
| miRNA-21                          | UAGCUUAUCAGACUGAUGUUGA<br>AACAUCAUCUGAUAAAGCUAAU  |
| Negative control                  | UUCUCCGAACGUGUCACGUTT<br>ACGUGACACGUUCGGAGAATT    |
